# Supplementary material for: Systematic review of high-cost patients’ characteristics and healthcare utilisation
Source: PubMed Central journal article supplement — BMJ Open. 2018 Sep 8;8(9):e023113. doi: 10.1136/bmjopen-2018-023113 (PMC6129088; doi:10.1136/bmjopen-2018-023113), 2018-09-08
Supplement: bmjopen-2018-023113supp001.pdf [file bmjopen-2018-023113supp001.pdf]

## Appendix 1. Final search strategy.

Pubmed:

((((((((High-cost\*) OR (high spending)) OR (Costliest) OR (highest-cost\*))) AND ((((((Patient\*) OR (Individual\*)) OR (Benefici\*) OR (Person\*)) OR (user\*)) NOT medline[sb])) OR ((((((("Economics, Hospital"[Mesh]) OR "Economics, Medical"[Mesh]) OR "Health Care Sector"[Mesh])) OR ("Costs and Cost Analysis"[Mesh])))) AND (((((((High-cost\*) OR (high spending)) OR (Costliest) OR (highest-cost\*))) AND ((((((Patient\*) OR (Individual\*)) OR (Benefici\*) OR (Person\*)) OR (user\*)))))

Embase:

|   |                                                                                                                                                                                                                           |
|---|---------------------------------------------------------------------------------------------------------------------------------------------------------------------------------------------------------------------------|
| 1 | (high-cost* or high spending or Costliest or highest-cost*).mp. [mp=title, abstract, subject headings, heading word, drug trade name, original title, device manufacturer, drug manufacturer, device trade name, keyword] |
| 2 | (patient* or individual* or benefici* or person* or user*).mp. [mp=title, abstract, subject headings, heading word, drug trade name, original title, device manufacturer, drug manufacturer, device trade name, keyword]  |
| 3 | "hospital cost"/ or "health care cost"/ or "cost"/ or economic aspect/ or "hospital utilization"/ or medicare/ or exp medicaid/                                                                                           |
| 4 | 1 and 2 and 3                                                                                                                                                                                                             |
| 5 | ((high-cost* or high spending or Costliest or highest-cost*) adj3 (patient* or individual* or benefici* or person* or user*).mp.                                                                                          |
| 6 | 4 or 5                                                                                                                                                                                                                    |
